# Supplementary material for: Estimation of surface free energy at microstructured surface to investigate intermediate wetting state for partial wetting model
Source: Royal Society of Chemistry journal article supplement (doi:10.1039/d2sm01406h), 2023-01-01
Supplement: d2sm01406h1.pdf [file d2sm01406h1.pdf]

Supporting information for:

**Estimation of Surface Free Energy at Microstructured Surface to Explore Intermediate Wetting State for Partial Wetting Model**

Yankun YU <sup>a</sup>, Dejian ZHANG <sup>b</sup> and Gyoko NAGAYAMA\*<sup>c</sup>

<sup>a</sup> *Graduate School of Engineering, Kyushu Institute of Technology, Sensui 1-1, Tobata, Kitakyushu, Fukuoka 804-8550, Japan*

<sup>b</sup> *School of Mechanical Engineering, Qilu University of Technology (Shandong Academy of Sciences), Daxue Road 3501, Changqing, Jinan, Shandong 250316, China*

<sup>c</sup> *Department of Mechanical Engineering, Kyushu Institute of Technology, Sensui 1-1, Tobata, Kitakyushu, Fukuoka 804-8550, Japan.*

The typical Nyquist plots and the corresponding fitted curves for Si samples are illustrated in Fig. s1.

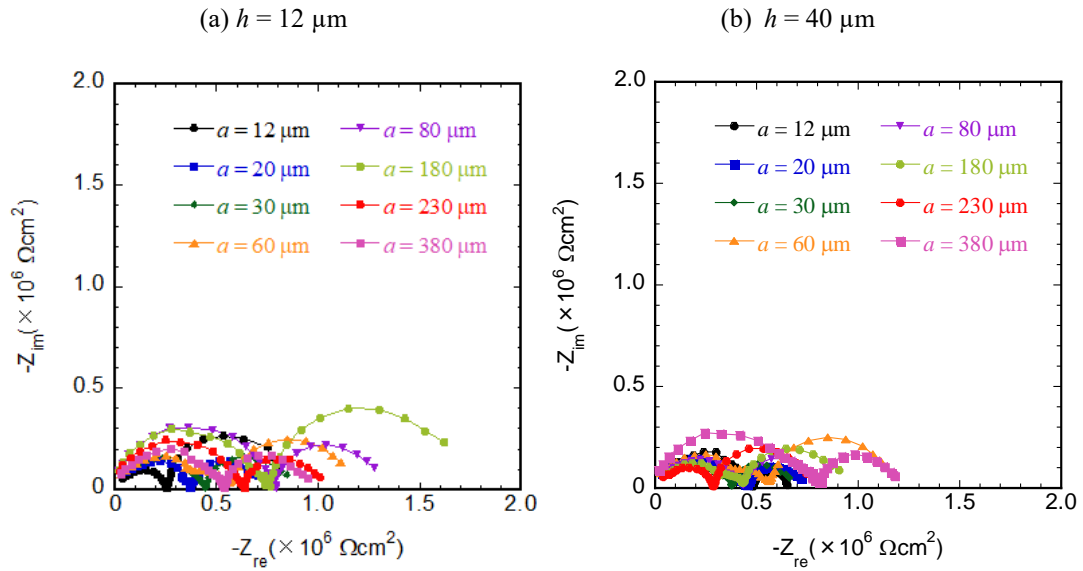

Fig. s1 Nyquist plots of the microstructured Si samples in deionized water for hole height (a)  $h = 12 \mu\text{m}$  and (b)  $h = 40 \mu\text{m}$ . Symbols represent the experimental results and lines are the corresponding fitted curves based on the EECs in Fig. s2.

The electrochemical parameters from the measured impedance spectra were analyzed based on the equivalent electrical circuits (EECs) at the solid–liquid interface. The dotted lines shown in Fig. s1 are the fitting curves corresponding to the EECs shown in Fig. s2.

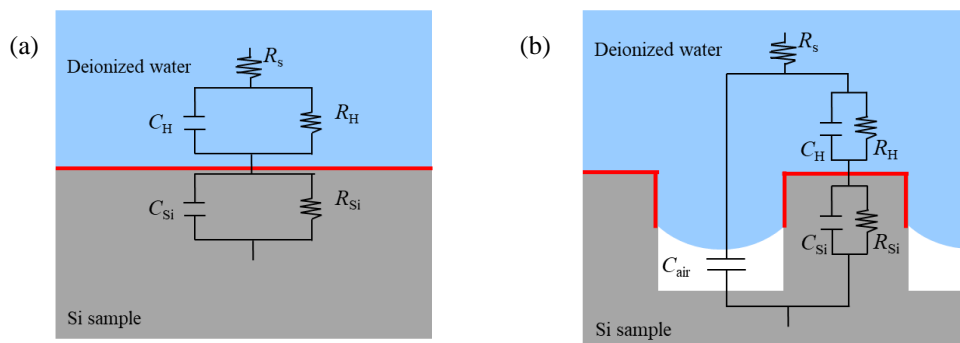

Fig. s2 Schematics of EECs at solid-liquid interface for Nyquist parameter analysis of (a) flat Si, (b) micro-patterned Si.

The obtained electrochemical parameters per unit apparent area, including  $R_s$ ,  $R_H$ ,  $R_{Si}$ ,  $CPE_H$  and  $CPE_{Si}$ , are listed in Table s1.

Table s1 EIS analytical results for Si samples based on the corresponding EECs.

| a ( $\mu\text{m}$ )  | $R_s$ ( $\Omega \cdot \text{cm}^2$ ) | $CPE_H$                                      |      | $R_H$ ( $\Omega \cdot \text{cm}^2$ ) | $CPE_{Si}$                                   |      | $R_{Si}$ ( $\Omega \cdot \text{cm}^2$ ) |
|----------------------|--------------------------------------|----------------------------------------------|------|--------------------------------------|----------------------------------------------|------|-----------------------------------------|
|                      |                                      | Q ( $\Omega^{-1}\text{s}^{-n}/\text{cm}^2$ ) | n    |                                      | Q ( $\Omega^{-1}\text{s}^{-n}/\text{cm}^2$ ) | n    |                                         |
| $h = 12 \mu\text{m}$ |                                      |                                              |      |                                      |                                              |      |                                         |
| 12                   | $4.25 \times 10^4$                   | $6.88 \times 10^{-7}$                        | 0.87 | $3.08 \times 10^5$                   | $4.93 \times 10^{-10}$                       | 0.75 | $3.88 \times 10^5$                      |
| 20                   | $3.49 \times 10^4$                   | $7.18 \times 10^{-7}$                        | 0.93 | $1.74 \times 10^5$                   | $2.72 \times 10^{-10}$                       | 0.79 | $4.56 \times 10^5$                      |
| 30                   | $4.09 \times 10^4$                   | $5.53 \times 10^{-7}$                        | 0.84 | $3.51 \times 10^5$                   | $5.66 \times 10^{-10}$                       | 0.73 | $4.81 \times 10^5$                      |
| 60                   | $2.94 \times 10^4$                   | $1.36 \times 10^{-6}$                        | 0.51 | $3.20 \times 10^5$                   | $1.83 \times 10^{-10}$                       | 0.82 | $5.13 \times 10^5$                      |
| 80                   | $3.67 \times 10^4$                   | $7.03 \times 10^{-7}$                        | 0.88 | $3.99 \times 10^5$                   | $8.35 \times 10^{-10}$                       | 0.71 | $4.44 \times 10^5$                      |
| 180                  | $2.51 \times 10^4$                   | $9.34 \times 10^{-7}$                        | 0.82 | $2.68 \times 10^5$                   | $1.19 \times 10^{-10}$                       | 0.85 | $6.12 \times 10^5$                      |
| 230                  | $3.09 \times 10^4$                   | $6.15 \times 10^{-7}$                        | 0.87 | $2.98 \times 10^5$                   | $1.72 \times 10^{-10}$                       | 0.82 | $5.28 \times 10^5$                      |
| 380                  | $3.42 \times 10^4$                   | $9.13 \times 10^{-7}$                        | 0.86 | $2.06 \times 10^5$                   | $1.53 \times 10^{-10}$                       | 0.83 | $4.29 \times 10^5$                      |
| $h = 40 \mu\text{m}$ |                                      |                                              |      |                                      |                                              |      |                                         |
| 12                   | $3.15 \times 10^4$                   | $9.52 \times 10^{-7}$                        | 0.83 | $2.08 \times 10^5$                   | $2.08 \times 10^{-10}$                       | 0.81 | $4.91 \times 10^5$                      |
| 20                   | $2.42 \times 10^4$                   | $6.24 \times 10^{-7}$                        | 0.74 | $2.80 \times 10^5$                   | $1.26 \times 10^{-10}$                       | 0.84 | $7.14 \times 10^5$                      |
| 30                   | $3.44 \times 10^4$                   | $1.27 \times 10^{-6}$                        | 0.83 | $1.39 \times 10^5$                   | $1.32 \times 10^{-9}$                        | 0.69 | $3.57 \times 10^5$                      |
| 60                   | $3.58 \times 10^4$                   | $6.16 \times 10^{-7}$                        | 0.93 | $1.20 \times 10^5$                   | $8.82 \times 10^{-10}$                       | 0.72 | $4.15 \times 10^5$                      |
| 80                   | $3.66 \times 10^4$                   | $8.07 \times 10^{-7}$                        | 0.86 | $2.39 \times 10^5$                   | $6.60 \times 10^{-10}$                       | 0.74 | $3.62 \times 10^5$                      |
| 180                  | $4.32 \times 10^4$                   | $9.12 \times 10^{-7}$                        | 0.91 | $1.41 \times 10^5$                   | $1.29 \times 10^{-9}$                        | 0.69 | $3.28 \times 10^5$                      |
| 230                  | $3.91 \times 10^4$                   | $8.00 \times 10^{-7}$                        | 1.00 | $8.39 \times 10^4$                   | $4.20 \times 10^{-9}$                        | 0.61 | $3.15 \times 10^5$                      |
| 380                  | $3.71 \times 10^4$                   | $7.68 \times 10^{-7}$                        | 0.92 | $1.21 \times 10^5$                   | $5.61 \times 10^{-10}$                       | 0.74 | $3.98 \times 10^5$                      |
| Flat Si              |                                      |                                              |      |                                      |                                              |      |                                         |
| -                    | $4.29 \times 10^4$                   | $8.23 \times 10^{-7}$                        | 0.95 | $2.73 \times 10^5$                   | $4.88 \times 10^{-10}$                       | 0.75 | $2.99 \times 10^5$                      |

For each microstructured Si surface, the EIS measurement and EECs analysis was conducted five times. The measured effective wetting ratio and standard derivation results are shown in Table s2.

Table s2  $A'_{sl}/A_{sl}$  for microstructured Si samples.

| $a$ [ $\mu\text{m}$ ] | $A'_{sl}/A_{sl}$ [-] |                      |
|-----------------------|----------------------|----------------------|
|                       | $h = 12 \mu\text{m}$ | $h = 40 \mu\text{m}$ |
| 12                    | 0.769±0.104          | 1.215±0.177          |
| 20                    | 1.052±0.085          | 1.091±0.134          |
| 30                    | 0.755±0.095          | 0.976±0.135          |
| 60                    | 0.642±0.073          | 1.063±0.126          |
| 80                    | 0.587±0.055          | 1.056±0.051          |
| 180                   | 0.648±0.044          | 0.945±0.117          |
| 230                   | 0.862±0.060          | 0.986±0.151          |
| 380                   | 1.251±0.249          | 0.865±0.113          |
